# Supplementary material for: A benzothiazole-coupled NS4-donor macrocycle and its complexation-based dual-channel sensing for Hg2+: the influence of anions and structure–function relationship
Source: Royal Society of Chemistry journal article supplement (doi:10.1039/d3nj03535b), 2023-01-01
Supplement: d3nj03535b1.pdf [file d3nj03535b1.pdf]

**Electronic supplementary information**  
**for**

**Benzothiazole-coupled NS<sub>4</sub>-donor macrocycle and its  
complexation-based dual-channel sensing for Hg<sup>2+</sup>: the influence  
of anions and structure-function relationship**

Yelim Lee, Joon Rae Kim, Eunji Lee\*

*Department of Chemistry, Gangneung-Wonju National University, Gangneung 25457, South Korea*

## Experimental

**Synthesis of 2.** The compound **2** was prepared via the modified procedure of the reported method in the literature<sup>S1</sup>. To a stirred solution of POCl<sub>3</sub> (5.14 mL, 55.2 mmol) and DMF (1.86 mL, 22.1 mmol) in a round-bottom flask, was added *N*-Phenyldiethanolamine (2.00 g, 11.0 mmol). The mixture was stirred at 80 °C for 12 h and then the resulting solution was poured into ice water. The resulting pale-brown precipitate was collected by filtration, washed with water and diethyl ether, and dried in a vacuum oven. Yield: 75 %. <sup>1</sup>H NMR (400 MHz, CDCl<sub>3</sub>): δ 9.79 (*s*, 1 H, CHO), 7.78 (*d*, 2 H, Ar), 6.75 (*d*, 2 H, Ar), 3.85 (*t*, 4 H, NCH<sub>2</sub>CH<sub>2</sub>Cl), 3.67 (*t*, 4 H, NCH<sub>2</sub>CH<sub>2</sub>Cl). Mass spectrum: *m/z* = 246.08 [C<sub>11</sub>H<sub>14</sub>Cl<sub>2</sub>NO]<sup>+</sup> (calcd 246.05).

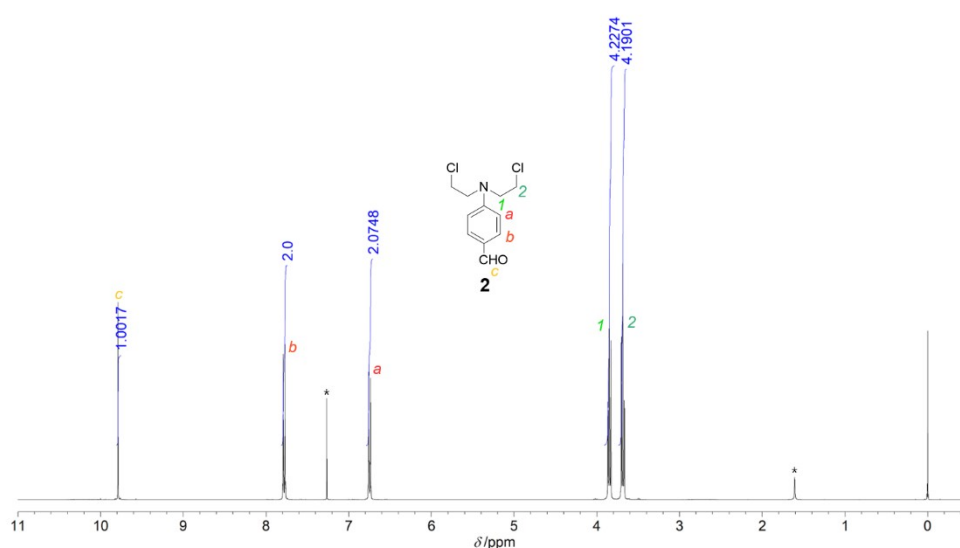

**Fig. S1** <sup>1</sup>H-NMR spectra of **2** in CDCl<sub>3</sub>.

**Synthesis of 3.** The compound **3** was prepared via the modified procedure of the reported method in the literature<sup>S2</sup>. Thiourea (1.09 g, 14.3 mmol) was added to a solution of *m*-xylylenebis(1-chloro-3-thiopropane)<sup>S2</sup> (1.04 g, 3.53 mmol) in ethanol (100 mL). The reaction mixture was refluxed for 3 h, allowed to cool to room temperature, and then evaporated. 100 mL of saturated NaHCO<sub>3</sub> was added and then the mixture was refluxed a further 3 h. After cooling to room temperature, the mixture was partitioned between water and chloroform. The combined organic phases were dried with anhydrous sodium sulfate and then evaporated to dryness. Crude product a yellow oil was used for the next reaction after drying without purification.

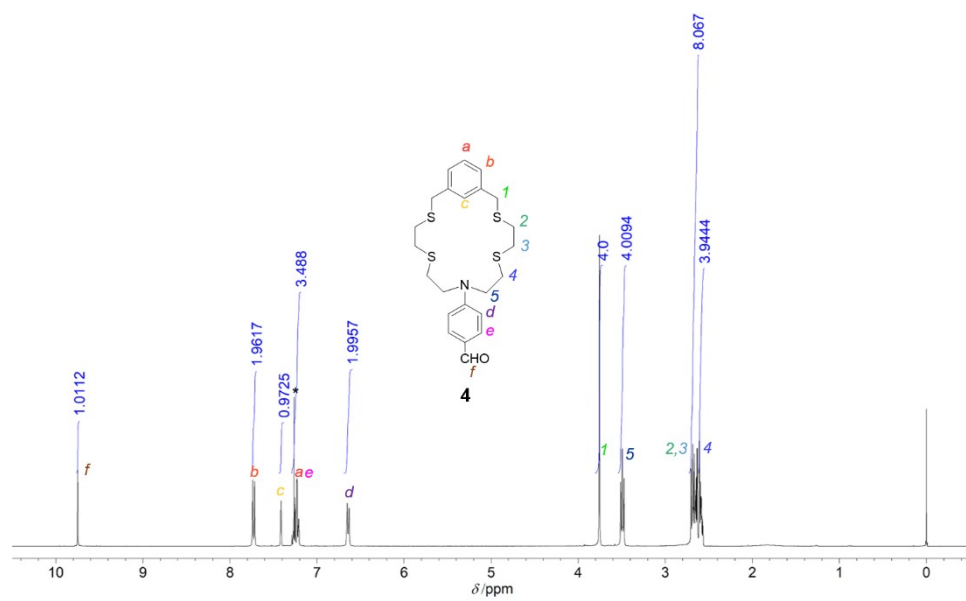

(a)

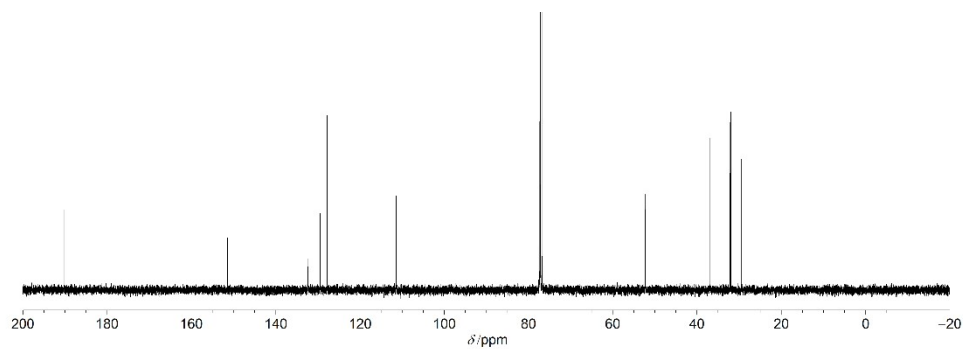

(b)

**Fig. S2** (a)  $^1\text{H-}$  and (b)  $^{13}\text{C-}$ NMR spectra of **4** in  $\text{CDCl}_3$ .

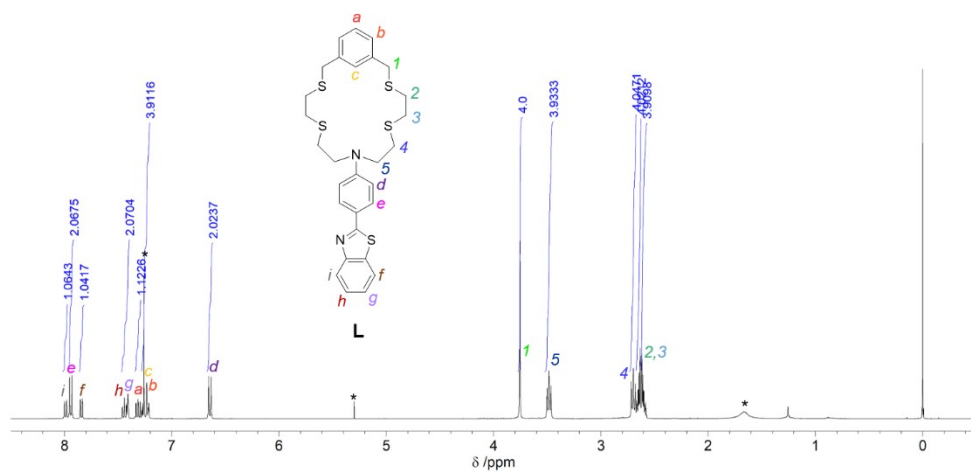

(a)

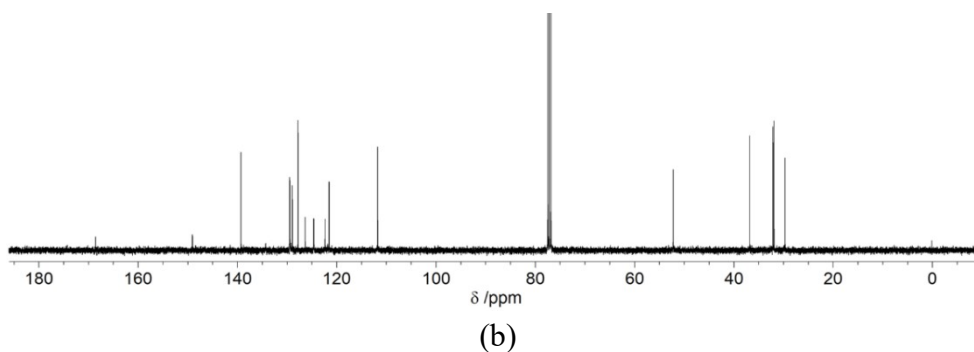

**Fig. S3** (a)  $^1\text{H}$ - and (b)  $^{13}\text{C}$ -NMR spectra of **L** in  $\text{CDCl}_3$

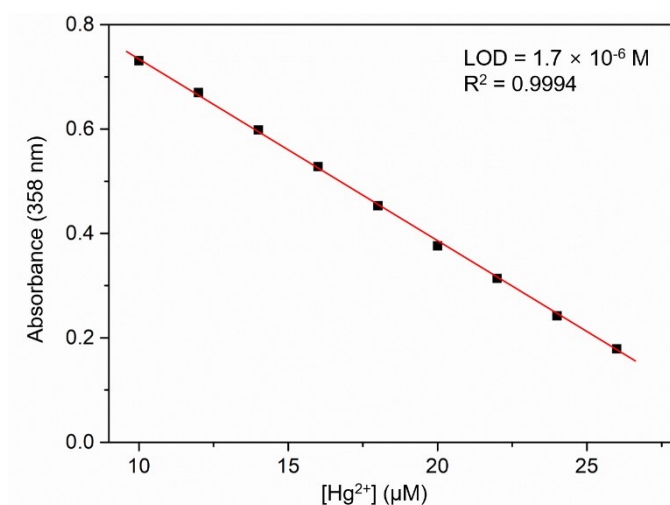

**Fig. S4** Linear fitting for the  $[\text{Hg}^{2+}]$  vs  $A$  from the UV-vis spectra of **L** in EtOH/DMSO (v/v, 9:1).

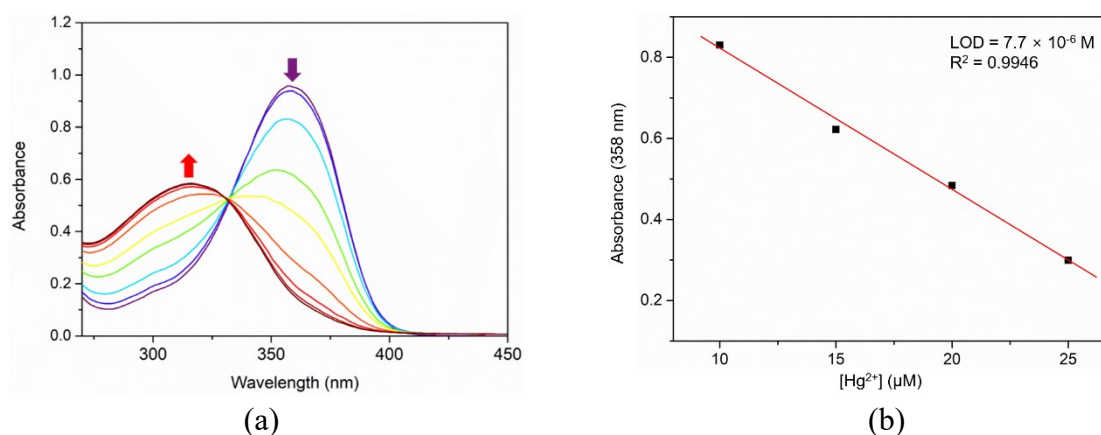

**Fig. S5** (a) UV-vis spectra of **L** ( $2.0 \times 10^{-5}$  M) with mercury(II) perchlorate (10–25  $\mu\text{M}$ ) in 95%EtOH/DMSO (v/v, 9:1). (b) Linear fitting for the  $[\text{Hg}^{2+}]$  vs  $A$  from the UV-vis spectra of **L** in the presence of  $\text{Hg}(\text{ClO}_4)_2$ .

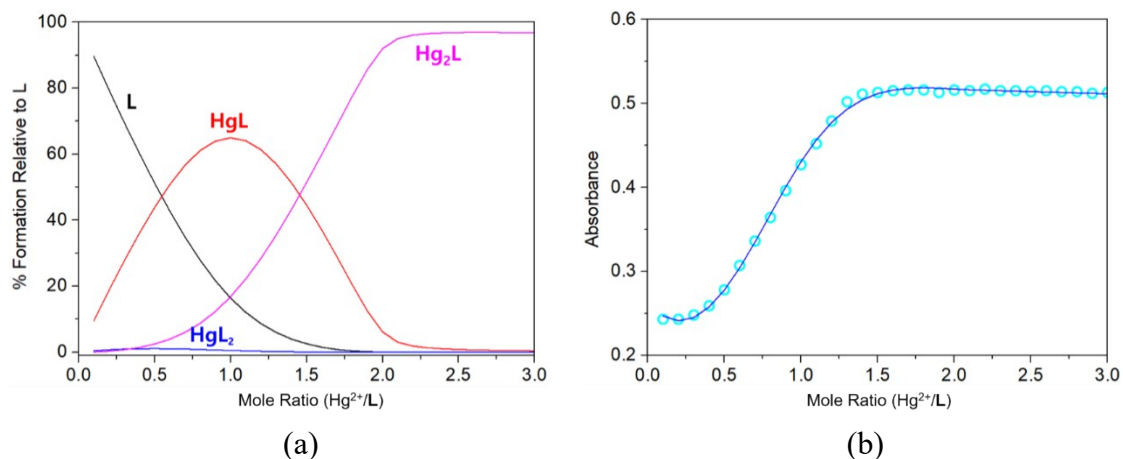

**Fig. S6** Curve-fitting for UV-vis titration data to determine the stability constants for the complexations of L with Hg(ClO<sub>4</sub>)<sub>2</sub> using HyperSpec software by employing the multiple binding model including 1:2, 1:1 and 2:1 (metal-to-ligand) ratios: (a) species distribution diagram and (b) HyperSpec output (○: experimental values, solid line: theoretical fit).

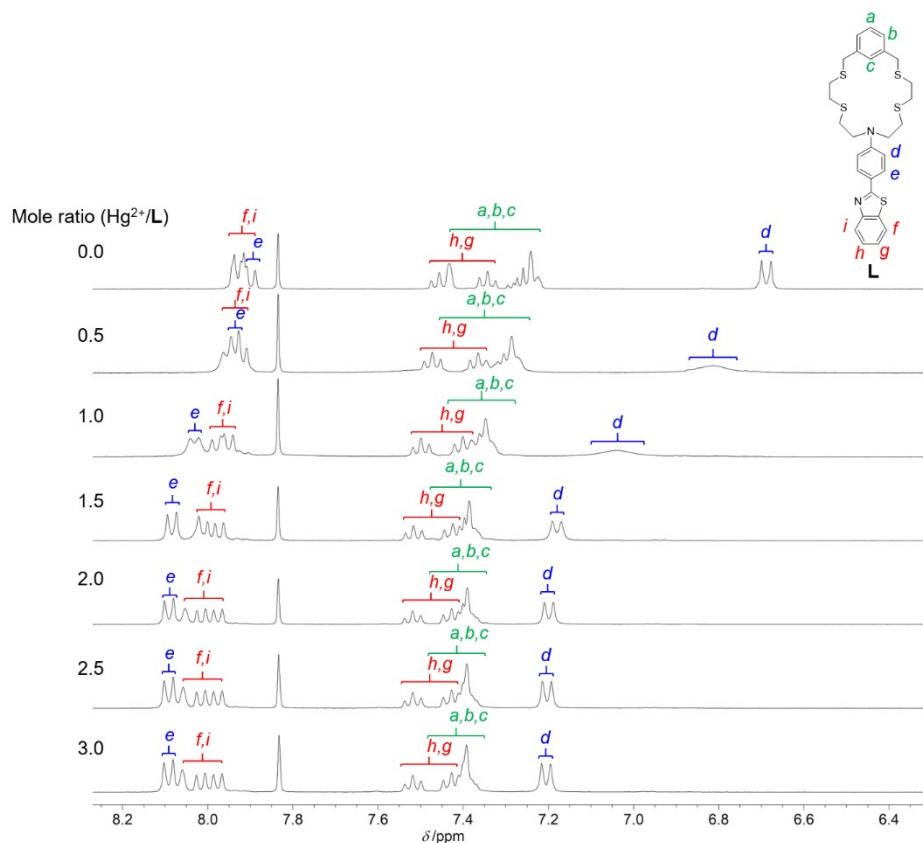

**Fig. S7** Comparative NMR spectra (aromatic region) of L in the presence of Hg(ClO<sub>4</sub>)<sub>2</sub> (0-2.0 equiv) in CDCl<sub>3</sub>/DMSO-*d*<sub>6</sub> (v/v, 5:2).

## X-ray crystallographic analysis

All data were collected on a Bruker D8 Venture PHOTON III M14 diffractometer equipped with graphite monochromated Mo K $\alpha$  radiation ( $\lambda = 0.71073 \text{ \AA}$ ) generated by a rotating anode. Data collection, data reduction, and semiempirical absorption correction were carried out using the software package APEX2.<sup>S3</sup> All of the calculations for the structure determination were carried out using the SHELXTL package.<sup>S4</sup> In all cases, all nonhydrogen atoms were refined anisotropically and all hydrogen atoms were placed in idealised positions and refined isotropically in a riding manner along with their respective parent atoms. Relevant crystal data collection and refinement data for the crystal structures are summarised in Table S1. CCDC 2281697 (L) and 2281698 (HgI<sub>2</sub> complex) contain supplementary crystallographic data for this paper. These data can be obtained free of charge from The Cambridge Crystallographic Data Centre via [www.ccdc.cam.ac.uk/data\\_request/cif](http://www.ccdc.cam.ac.uk/data_request/cif).

**Table S1.** Crystal and Experimental Data and Refinement Parameters

|                                                                                      | L                                                             | [Hg <sub>2</sub> (L)I <sub>4</sub> ]                                                         |
|--------------------------------------------------------------------------------------|---------------------------------------------------------------|----------------------------------------------------------------------------------------------|
| Formula                                                                              | C <sub>29</sub> H <sub>32</sub> N <sub>2</sub> S <sub>5</sub> | C <sub>29</sub> H <sub>32</sub> Hg <sub>2</sub> I <sub>4</sub> N <sub>2</sub> S <sub>5</sub> |
| Formula weight                                                                       | 568.86                                                        | 1477.64                                                                                      |
| Temperature                                                                          | 223(2)                                                        | 223(2)                                                                                       |
| Crystal system                                                                       | Triclinic                                                     | Monoclinic                                                                                   |
| Space group                                                                          | <i>P</i> -1                                                   | <i>P</i> 2 <sub>1</sub> / <i>n</i>                                                           |
| <i>Z</i>                                                                             | 2                                                             | 4                                                                                            |
| <i>a</i> (Å)                                                                         | 9.831(5)                                                      | 8.6176(2)                                                                                    |
| <i>b</i> (Å)                                                                         | 10.536(6)                                                     | 19.1568(4)                                                                                   |
| <i>c</i> (Å)                                                                         | 14.817(8)                                                     | 22.9808(4)                                                                                   |
| $\alpha$ (°)                                                                         | 90.682(17)                                                    | 90                                                                                           |
| $\beta$ (°)                                                                          | 91.831(15)                                                    | 94.7210(10)                                                                                  |
| $\gamma$ (°)                                                                         | 110.896(15)                                                   | 90                                                                                           |
| <i>V</i> (Å <sup>3</sup> )                                                           | 1432.6(13)                                                    | 3780.93(14)                                                                                  |
| <i>D</i> <sub>calc</sub> (g/cm <sup>3</sup> )                                        | 1.319                                                         | 2.596                                                                                        |
| 2 $\theta$ <sub>max</sub> (°)                                                        | 52.00                                                         | 52.00                                                                                        |
| Goodness-of-fit on F <sup>2</sup>                                                    | 1.032                                                         | 1.038                                                                                        |
| <i>R</i> <sub>1</sub> , <i>wR</i> <sub>2</sub> [ <i>I</i> > 2 $\sigma$ ( <i>I</i> )] | 0.0671, 0.1895                                                | 0.0310, 0.0677                                                                               |
| <i>R</i> <sub>1</sub> , <i>wR</i> <sub>2</sub> [all data]                            | 0.1161, 0.2291                                                | 0.0406, 0.0717                                                                               |
| No. of reflection used [>2 $\sigma$ ( <i>I</i> )]                                    | 7046 [ <i>R</i> <sub>int</sub> = 0.0643]                      | 7435 [ <i>R</i> <sub>int</sub> = 0.0431]                                                     |
| Refinement                                                                           | full-matrix                                                   | full-matrix                                                                                  |

**Table S2** Selected bond lengths (Å) and bond angles (°) for [Hg<sub>2</sub>(L)I<sub>4</sub>]

|           |          |           |          |
|-----------|----------|-----------|----------|
| Hg1-I1    | 2.643(1) | Hg2-I3    | 2.610(1) |
| Hg1-I2    | 2.620(1) | Hg2-I4    | 2.642(1) |
| Hg1-S1    | 2.813(2) | Hg2-S3    | 2.886(2) |
| Hg1-S2    | 2.792(2) | Hg2-S4    | 2.861(2) |
| I1-Hg1-I2 | 144.3(2) | I3-Hg2-I4 | 154.8(2) |
| I2-Hg1-S2 | 106.4(1) | I3-Hg2-S4 | 98.1(1)  |
| I1-Hg1-S2 | 102.5(1) | I4-Hg2-S4 | 101.4(1) |
| I2-Hg1-S1 | 103.5(1) | I3-Hg2-S3 | 112.7(1) |
| I1-Hg1-S1 | 101.8(1) | I4-Hg2-S3 | 87.6(1)  |
| S1-Hg1-S2 | 79.7(1)  | S3-Hg2-S4 | 76.0(1)  |

## References

- S1. J. Massin, W. Dayoub, J.-C. Mulatier, C. Aronica, Y. Bretonniere and C. Andraud, *Chem. Mater.*, 2011, **23**, 862–873.
- S2. J. Buter, R. M. Kellogg and F. V. Bolhuisb, *J. Chem. Soc., Chem. Commun.*, 1990, 282–284.
- S3. Bruker, *APEX2 Version 2009.1-0 Data collection and Processing Software*, Bruker AXS Inc., Madison, Wisconsin, U.S.A., 2008.
- S4. Bruker, *SHELXTL-PC Version 6.22 Program for Solution and Refinement of Crystal Structures*, Bruker AXS Inc., Madison, Wisconsin, U.S.A., 2008.
